# Supplementary material for: Effect of lanthanide contraction and rigid ligand on the structure of salen-type lanthanide complexes
Source: Royal Society of Chemistry journal article supplement (doi:10.1039/c1ce05501a), 2011-01-01
Supplement: c1ce05501a.pdf [file c1ce05501a.pdf]

# Effect of Lanthanide Contraction and Rigid Ligand on the Structure of Salen Type Lanthanide Complexes †

Peng Chen, Han Chen, Pengfei Yan\*, Yan Wang and Guangming Li\*

*Key Laboratory of Functional Inorganic Material Chemistry (MOE), P. R. China; School of Chemistry and Materials Science, Heilongjiang University; No. 74, Xuefu Road, Nangang District, Harbin 150080, P. R. China. Email: yanpf@vip.sina.com; gml\_i\_2000@163.com.*

**Electronic supplementary information (ESI):**

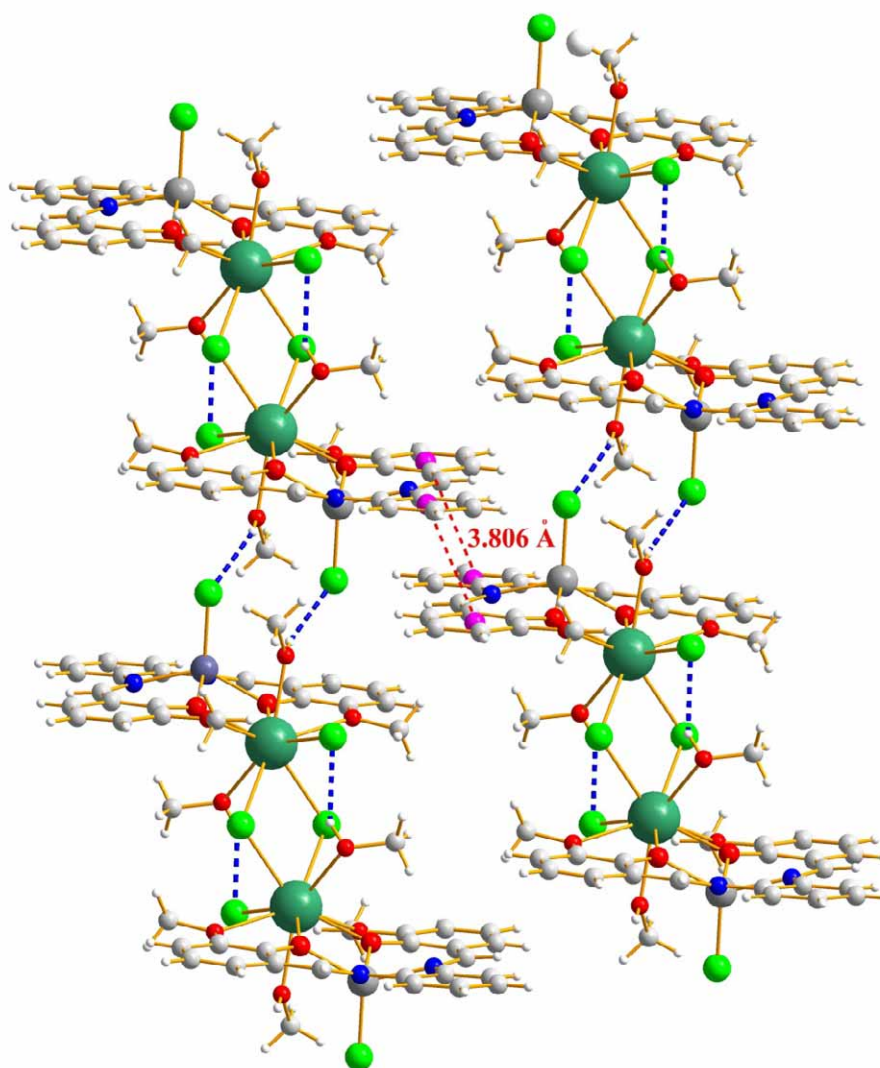

Fig. S1 The 1D chain structure formed by the intermolecular H-bonding and  $\pi$ - $\pi$  interaction in **1**. The blue dash line shows the H-bonding, and the purple dash line shows the  $\pi$ - $\pi$  interactions between two dimers.

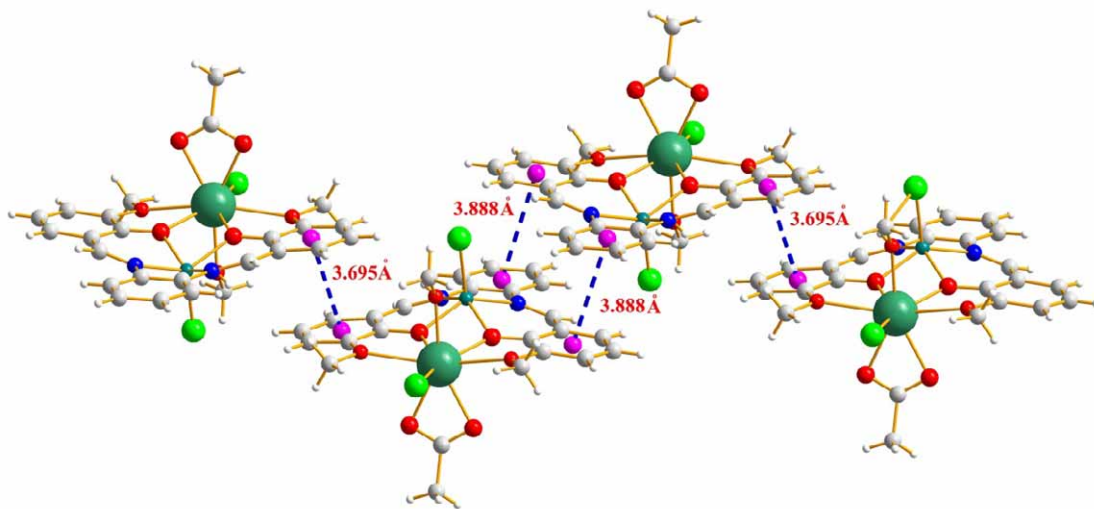

Fig. S2 The 1D chain structure formed by the intermolecular  $\pi$ - $\pi$  interaction in **3**. The purple dash line shows the  $\pi$ - $\pi$  interactions between the molecular structures of **3**.

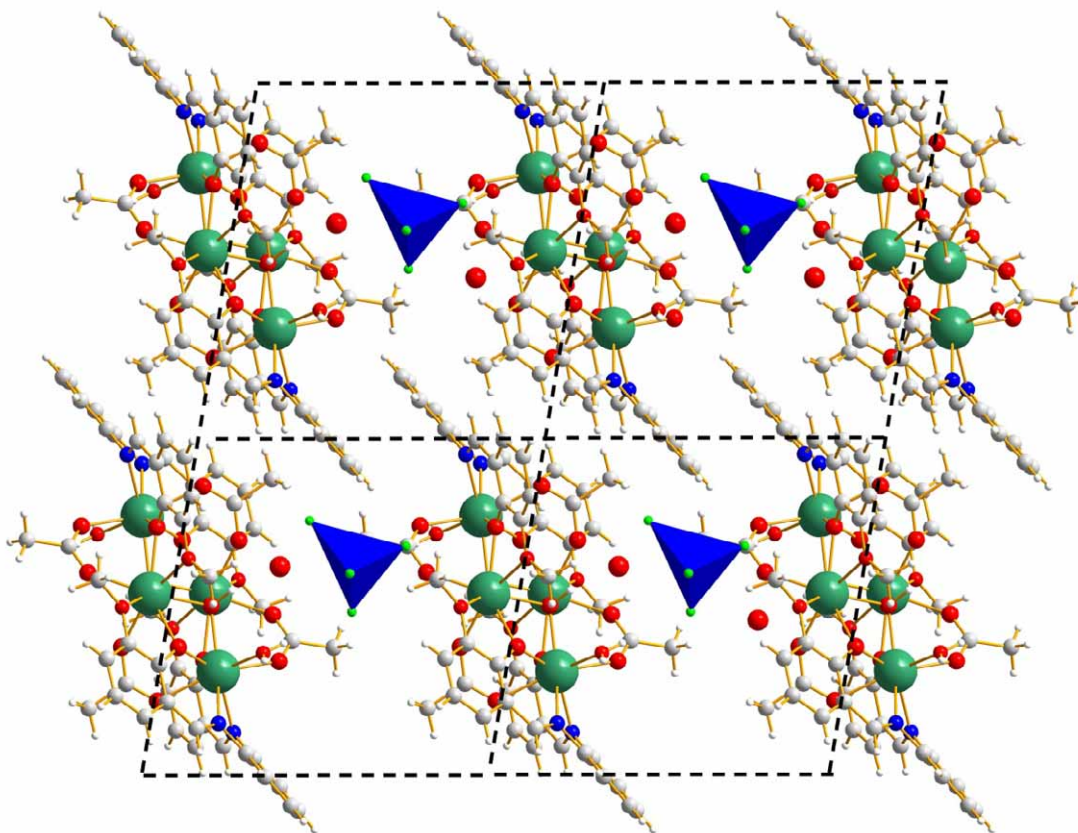

Fig. S3 Viewing along the  $b$  axis, showing the packing structure of **4** (The blue tetrahedra represent the  $[\text{ZnCl}_4]^{2-}$  units and disordered parts have been removed for clarity).

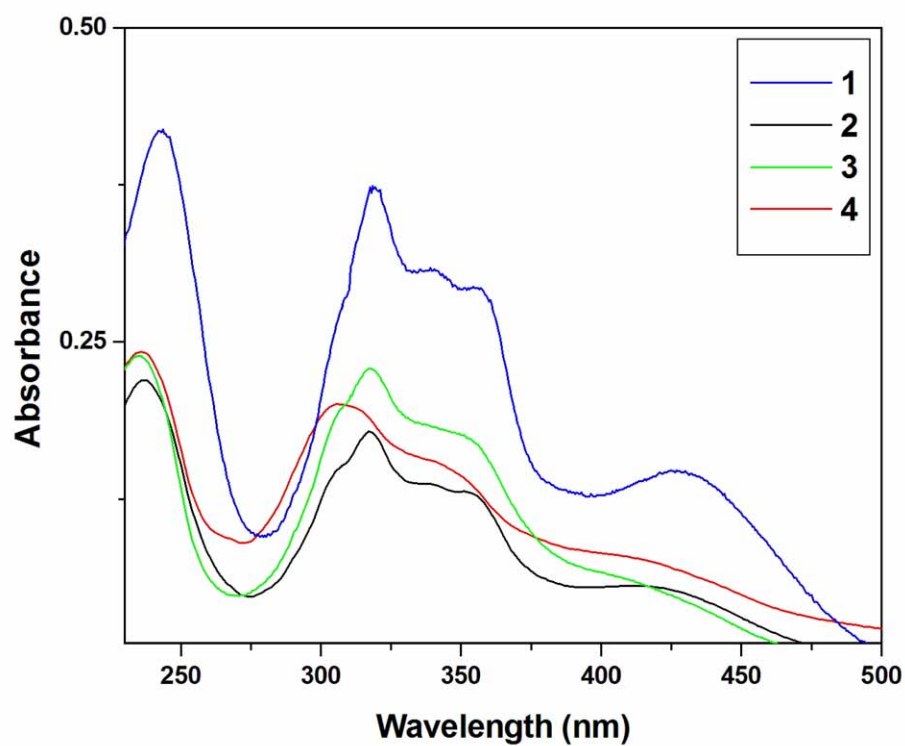

Fig. S4 The UV spectra of **1-4** in solid.

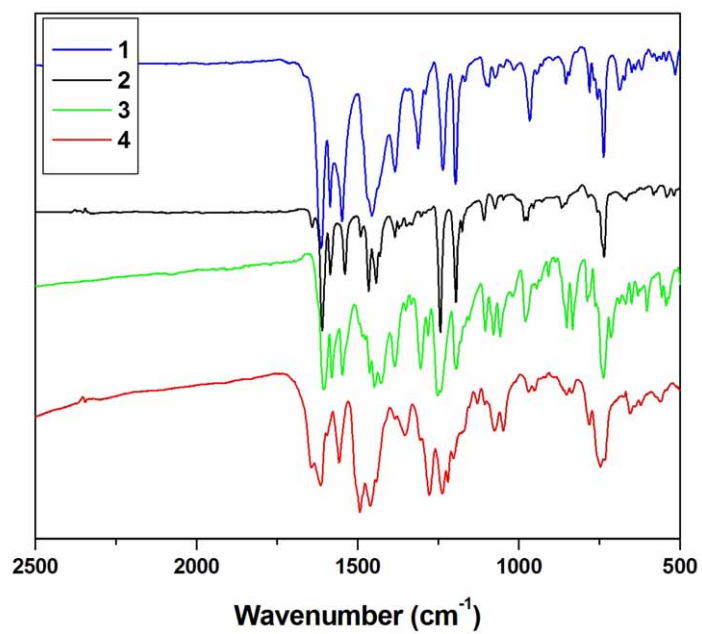

Fig. S5 The IR spectra of **1-4**.
